# Supplementary material for: An Assessment of Cataract Severity Based on Antioxidant Status and Ascorbic Acid Levels in Aqueous Humor
Source: MDPI journal article supplement (doi:10.3390/antiox11020397), 2022-02-16
Supplement: s1 [file s1]

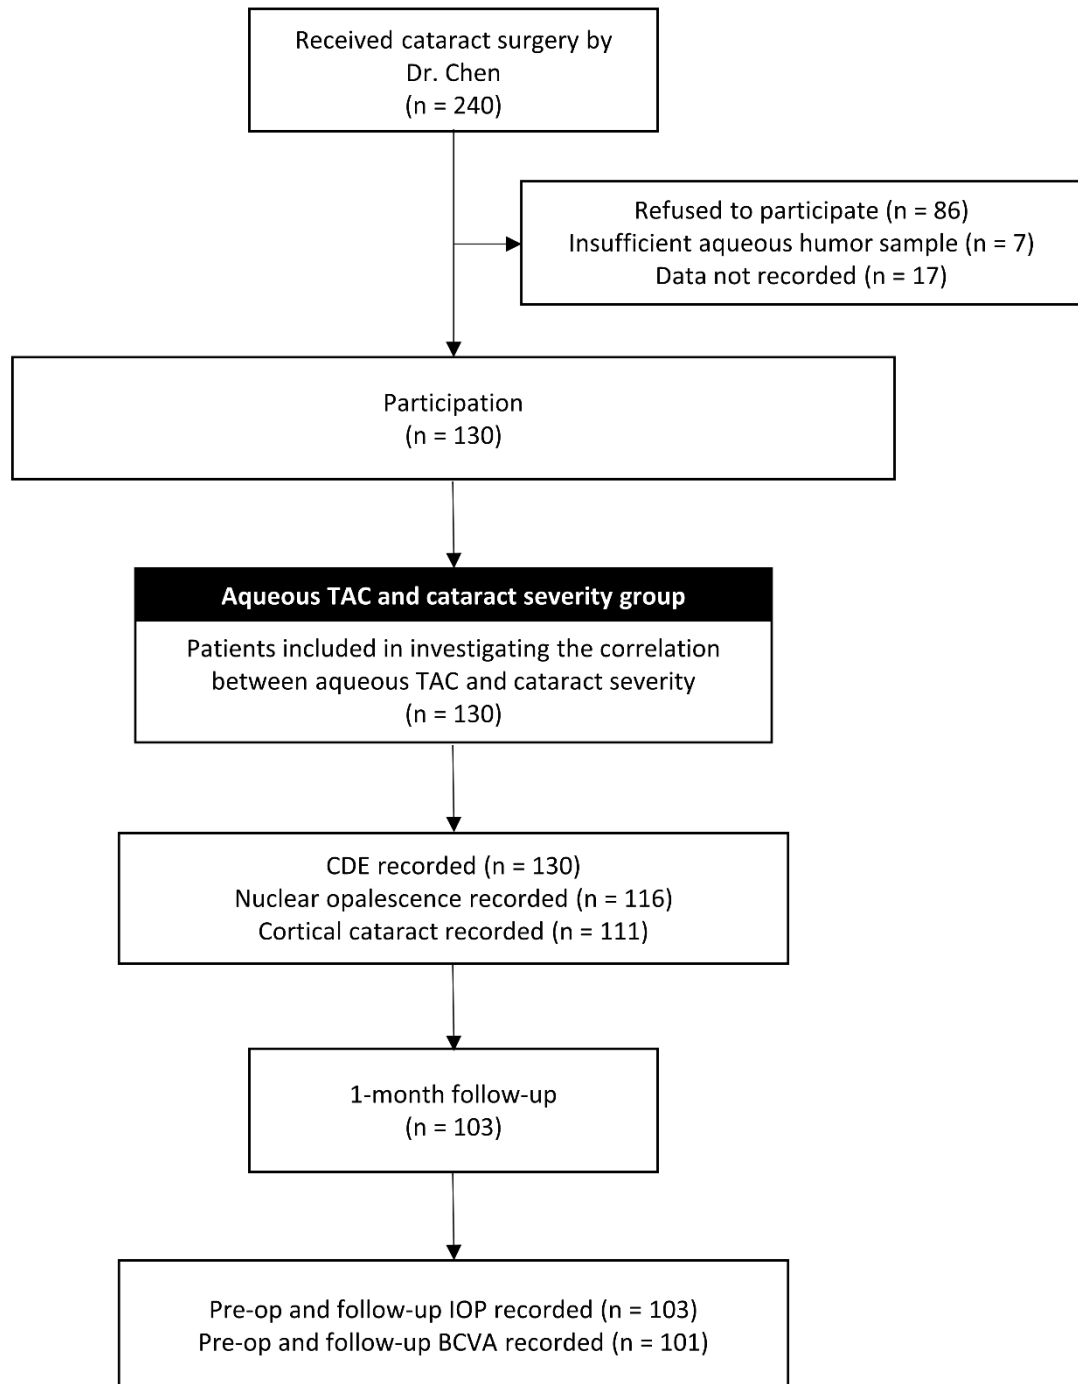

BCVA = best corrected visual acuity; CDE = cumulative dissipated energy; IOP = intraocular pressure; TAC = total antioxidant capacity

**Supplementary Figure S1.** Flow diagram of the recruitment process of the study subjects.
