# Supplementary material for: An Assessment of Cataract Severity Based on Antioxidant Status and Ascorbic Acid Levels in Aqueous Humor
Source: MDPI journal article supplement (doi:10.3390/antiox11020397), 2022-02-16
Supplement: s1 [file s1]

**Table S3.** Univariate and multivariate linear regression analyses for the improvement of best corrected visual acuity after cataract surgery.

| Variable                           | Univariate Regression |       |         | Multivariate Regression |       |         |
|------------------------------------|-----------------------|-------|---------|-------------------------|-------|---------|
|                                    | B                     | SE    | P value | B                       | SE    | P value |
| Total antioxidant capacity         | -0.147                | 0.111 | 0.188   | -0.109                  | 0.113 | 0.335   |
| <b>Basic characteristics</b>       |                       |       |         |                         |       |         |
| OD / OS                            | -0.09                 | 0.077 | 0.245   | -0.09                   | 0.074 | 0.229   |
| Age                                | -0.013                | 0.004 | 0.002** | -0.009                  | 0.006 | 0.107   |
| Gender                             | 0.053                 | 0.077 | 0.497   | 0.038                   | 0.076 | 0.619   |
| BMI                                | 0.004                 | 0.011 | 0.72    | 0.001                   | 0.011 | 0.961   |
| Disease diagnosis                  | 0.325                 | 0.107 | 0.003** | 0.234                   | 0.157 | 0.14    |
| <b>Underlying disease</b>          |                       |       |         |                         |       |         |
| Hypertension                       | -0.008                | 0.078 | 0.92    | 0.056                   | 0.091 | 0.543   |
| Diabetes mellitus                  | 0.138                 | 0.098 | 0.163   | 0.203                   | 0.101 | 0.048*  |
| Other underlying systemic diseases | 0.011                 | 0.078 | 0.891   | 0.053                   | 0.087 | 0.546   |

B = beta coefficient; BMI = body mass index; OD = oculus dextrus; OS = oculus sinister;

SE = standard error

Age, eye site, gender, body mass index, disease diagnosis, and underlying diseases were adjusted in the multivariate regression as confounding factors.

P value of the multivariate regression model is 0.02.

Other systemic diseases include dyslipidemia, heart diseases, kidney diseases, lung diseases, liver diseases, stroke, immunocompromised status, and autoimmune diseases.

\*\* : p-value < 0.01
