# Supplementary material for: An Assessment of Cataract Severity Based on Antioxidant Status and Ascorbic Acid Levels in Aqueous Humor
Source: MDPI journal article supplement (doi:10.3390/antiox11020397), 2022-02-16
Supplement: s1 [file s1]

**Table S2.** Univariate and multivariate linear regression analyses for cumulative dissipated energy during the phacoemulsification process based on nuclear opalescence and cortical cataract.

| Variable            | Univariate Regression |       |                | Multivariate Regression |       |                |
|---------------------|-----------------------|-------|----------------|-------------------------|-------|----------------|
|                     | B                     | SE    | <i>P</i> value | B                       | SE    | <i>P</i> value |
| Nuclear Opalescence | 1.75                  | 2.719 | 0.521          | 0.992                   | 2.776 | 0.722          |
| Cortical Cataract   | −0.212                | 3.532 | 0.952          | −1.468                  | 3.528 | 0.678          |

B = beta coefficient; SE = standard error

Age, eye site, gender, body mass index, disease diagnosis, and underlying diseases were adjusted in the multivariate regression as confounding factors.

*P* value of the multivariate regression model is 0.286 for the nuclear opalescence model and 0.094 for the cortical cataract model.
