# Supplementary material for: An Assessment of Cataract Severity Based on Antioxidant Status and Ascorbic Acid Levels in Aqueous Humor
Source: MDPI journal article supplement (doi:10.3390/antiox11020397), 2022-02-16
Supplement: s1 [file s1]

Table S4. Univariate and multivariate linear regression analyses for changes in intraocular pressure after cataract surgery.

| Variable                           | Univariate Regression |       |         | Multivariate Regression |       |         |
|------------------------------------|-----------------------|-------|---------|-------------------------|-------|---------|
|                                    | B                     | SE    | P value | B                       | SE    | P value |
| Total antioxidant capacity         | 0.375                 | 0.645 | 0.562   | 0.65                    | 0.662 | 0.327   |
| <b>Basic characteristics</b>       |                       |       |         |                         |       |         |
| OD/OS                              | -0.575                | 0.476 | 0.23    | -0.609                  | 0.479 | 0.206   |
| Age                                | 0                     | 0.027 | 0.99    | 0.042                   | 0.036 | 0.243   |
| Gender                             | -0.855                | 0.471 | 0.072   | -1.123                  | 0.494 | 0.025   |
| BMI                                | -0.016                | 0.069 | 0.812   | -0.04                   | 0.075 | 0.599   |
| Disease diagnosis                  | 0.943                 | 0.764 | 0.219   | 2.161                   | 1.059 | 0.043*  |
| <b>Underlying disease</b>          |                       |       |         |                         |       |         |
| Hypertension                       | 0.038                 | 0.488 | 0.939   | 0.008                   | 0.582 | 0.988   |
| Diabetes mellitus                  | -0.138                | 0.58  | 0.812   | -0.162                  | 0.601 | 0.788   |
| Other underlying systemic diseases | 0.186                 | 0.482 | 0.701   | 0.449                   | 0.545 | 0.412   |

B = beta coefficient; BMI = body mass index; OD = oculus dextrus; OS = oculus sinister;

SE = standard error

Age, eye site, gender, body mass index, disease diagnosis, and underlying diseases were adjusted in the multivariate regression as confounding factors.

P value of the multivariate regression model is 0.32.

Other systemic diseases include dyslipidemia, heart disease, kidney disease, lung disease, liver disease, stroke, immunocompromised status, and autoimmune disease.

\*: p-value < 0.05
