# Supplementary material for: An Assessment of Cataract Severity Based on Antioxidant Status and Ascorbic Acid Levels in Aqueous Humor
Source: MDPI journal article supplement (doi:10.3390/antiox11020397), 2022-02-16
Supplement: s1 [file s1]

**Table S1.** Univariate and multivariate linear regression analyses of ascorbic acid for cumulative dissipated energy during the phacoemulsification process.

| Variable                          | Univariate Regression |      |         | Multivariate Regression |      |         |
|-----------------------------------|-----------------------|------|---------|-------------------------|------|---------|
|                                   | B                     | SE   | P value | B                       | SE   | P value |
| Ascorbic Acid Level               | -15.53                | 5.23 | 0.004** | -16.27                  | 5.30 | 0.003** |
| <b>Basic characteristics</b>      |                       |      |         |                         |      |         |
| OD / OS                           | 0.31                  | 3.79 | 0.934   | -0.13                   | 3.68 | 0.972   |
| Age                               | 0.45                  | 0.21 | 0.034*  | 0.66                    | 0.28 | 0.021*  |
| Gender                            | -2.58                 | 3.77 | 0.496   | 1.16                    | 3.81 | 0.762   |
| BMI                               | -0.01                 | 0.54 | 0.99    | -0.38                   | 0.58 | 0.509   |
| Disease diagnosis                 | -0.11                 | 6.09 | 0.986   | 12.50                   | 8.23 | 0.131   |
| <b>Underlying disease</b>         |                       |      |         |                         |      |         |
| Hypertension                      | 0.61                  | 3.87 | 0.876   | 0.516                   | 4.52 | 0.909   |
| Diabetes mellitus                 | 11.4                  | 4.48 | 0.012*  | 9.319                   | 4.60 | 0.045   |
| Other underlying systemic disease | -3.73                 | 3.81 | 0.329   | -4.584                  | 4.26 | 0.284   |

B = beta coefficient; BMI = body mass index; OD = oculus dextrus; OS = oculus sinister; SE = standard error,

Age, eye site, gender, body mass index, disease diagnosis, and underlying diseases were adjusted in the multivariate regression as confounding factors.

P value of the multivariate regression model is 0.001.

Other systemic diseases include dyslipidemia, heart diseases, kidney diseases, lung diseases, liver diseases, stroke, immunocompromised status, and autoimmune diseases. \*: p-value < 0.05; \*\*: p-value < 0.01
