# Supplementary material for: An Assessment of Cataract Severity Based on Antioxidant Status and Ascorbic Acid Levels in Aqueous Humor
Source: MDPI journal article supplement (doi:10.3390/antiox11020397), 2022-02-16
Supplement: s1 [file s1]

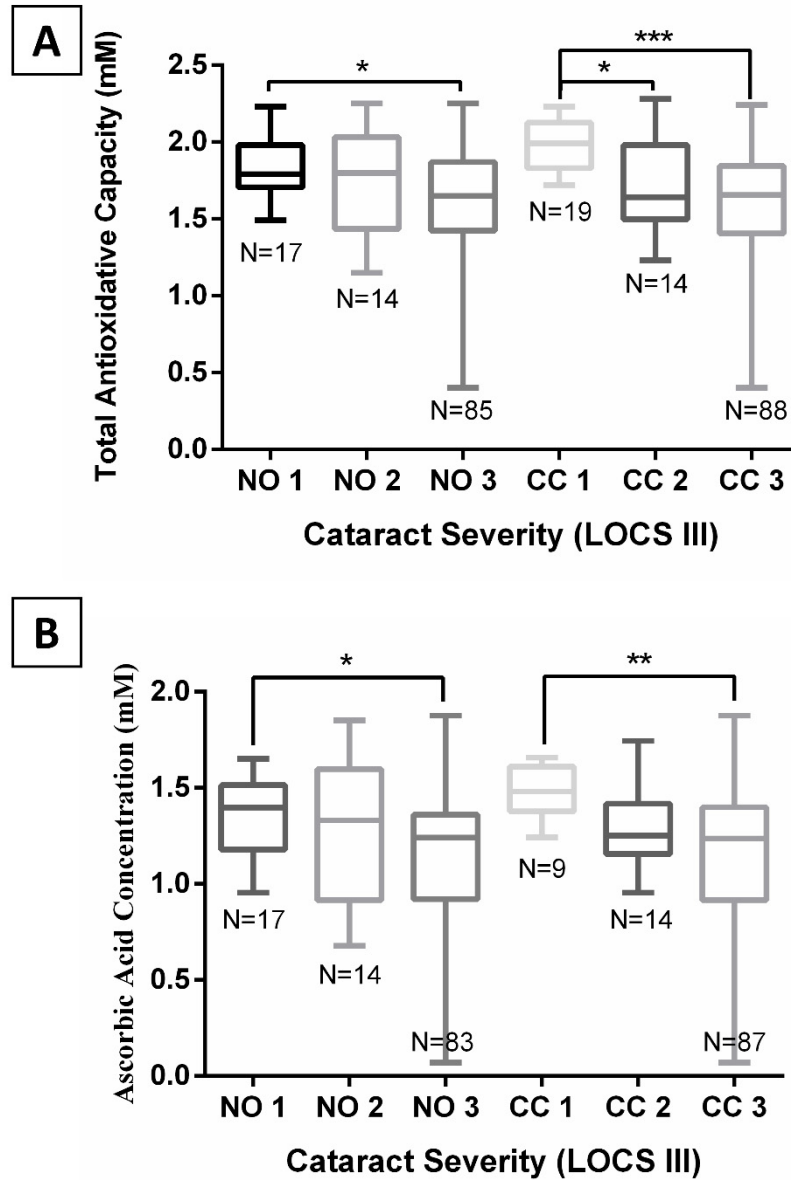

**Figure S2.** Bar chart showing the total antioxidant capacity (TAC) and ascorbic acid concentration (AA) in each LOCS severity score: **(A)** The bar chart of TAC in each LOCS severity score. The aqueous humor TAC shows a significant difference between nuclear opalescence (NO) grade 1 group and grade 3 group when using Mann–Whitney U test (P value = 0.016). There is also a significant difference between cortical cataract (CC) grade 1 and grade 2 groups, and grade 1 and grade 3 groups when analyzed by Mann–Whitney U test (P value = 0.039 and P value < 0.001 respectively); **(B)** the bar chart of AA in each LOCS severity score. The aqueous humor AA level is significantly different between nuclear opalescence (NO) grade 1 and grade 3 groups when analyzed by Mann–Whitney U test (P value = 0.016). There is also a significant difference between cortical cataract (CC) grade 1 and grade 3 groups when analyzed by Mann–Whitney U test (P value = 0.002). \*: p-value < 0.05; \*\*: p-value < 0.01; \*\*\*: p-value < 0.001.
