# Supplementary material for: An Assessment of Cataract Severity Based on Antioxidant Status and Ascorbic Acid Levels in Aqueous Humor
Source: MDPI journal article supplement (doi:10.3390/antiox11020397), 2022-02-16
Supplement: s1 [file s1]

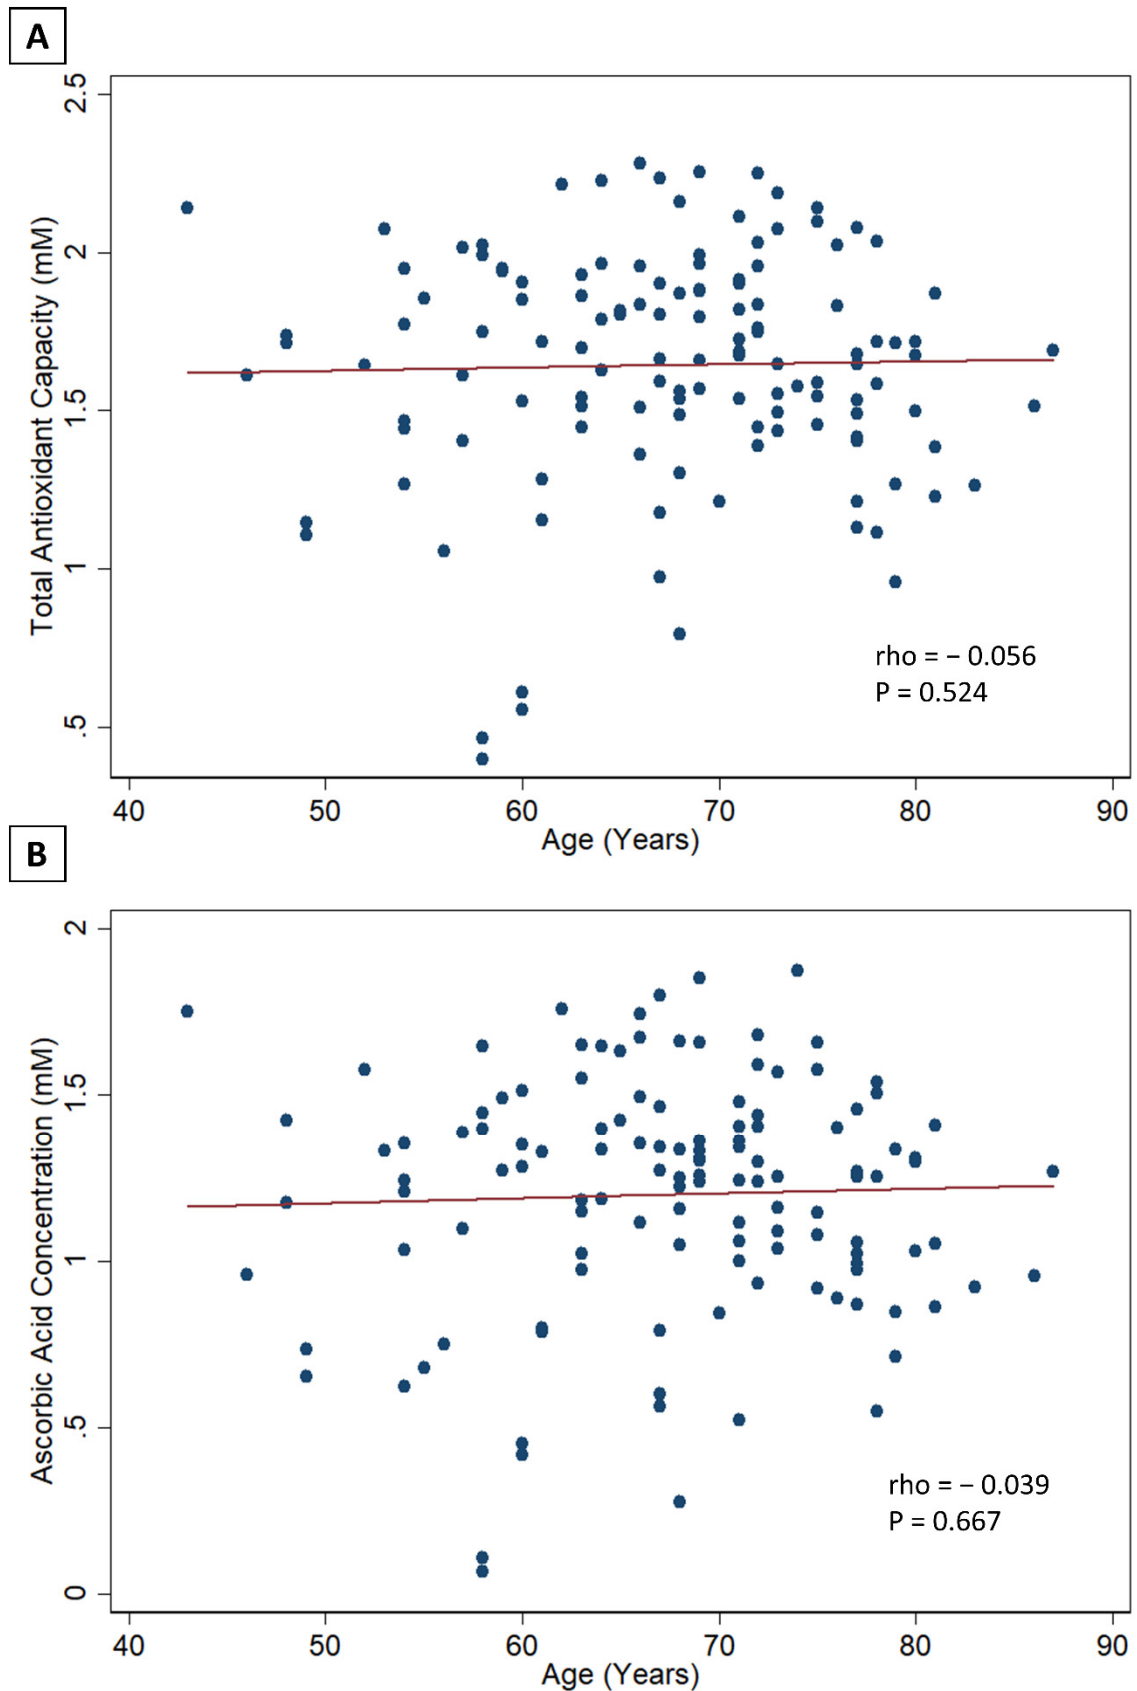

**Supplementary Figure S2.** Scatter plot showing the correlation between aqueous humor total antioxidant capacity (TAC)/ascorbic acid concentration (AA) and Patient Age: **(A)** There was no significant correlation between aqueous humor TAC and patient age, as measured by Spearman correlation coefficient ( $P$  value = 0.524); **(B)** there was no significant correlation between aqueous humor TAC and patient age, as measured by Spearman correlation coefficient ( $P$  value = 0.667).
