# Supplementary material for: An Assessment of Cataract Severity Based on Antioxidant Status and Ascorbic Acid Levels in Aqueous Humor
Source: Antioxidants (Basel). 2022 Feb 16;11(2):397. doi: 10.3390/antiox11020397 (PMC8869206; doi:10.3390/antiox11020397)
Supplement: Supplementary file 1 [file antioxidants-11-00397-s001.zip]

Archive with 7 entries (7 files):
- Supplementary Figure S1-edited.pdf
- Supplementary Figure S2-edited.pdf
- Supplementary Figure S3-edited.pdf
- Supplementary Table S1-edited.pdf
- Supplementary Table S2-edited.pdf
- Supplementary Table S3-edited.pdf
- Supplementary Table S4-edited.pdf
